# Supplementary material for: Genomic Epidemiology of SARS-CoV-2 in Tocantins State and the Diffusion of P.1.7 and AY.99.2 Lineages in Brazil
Source: MDPI journal article supplement (doi:10.3390/v14040659), 2022-03-23
Supplement: s1 [file s1]

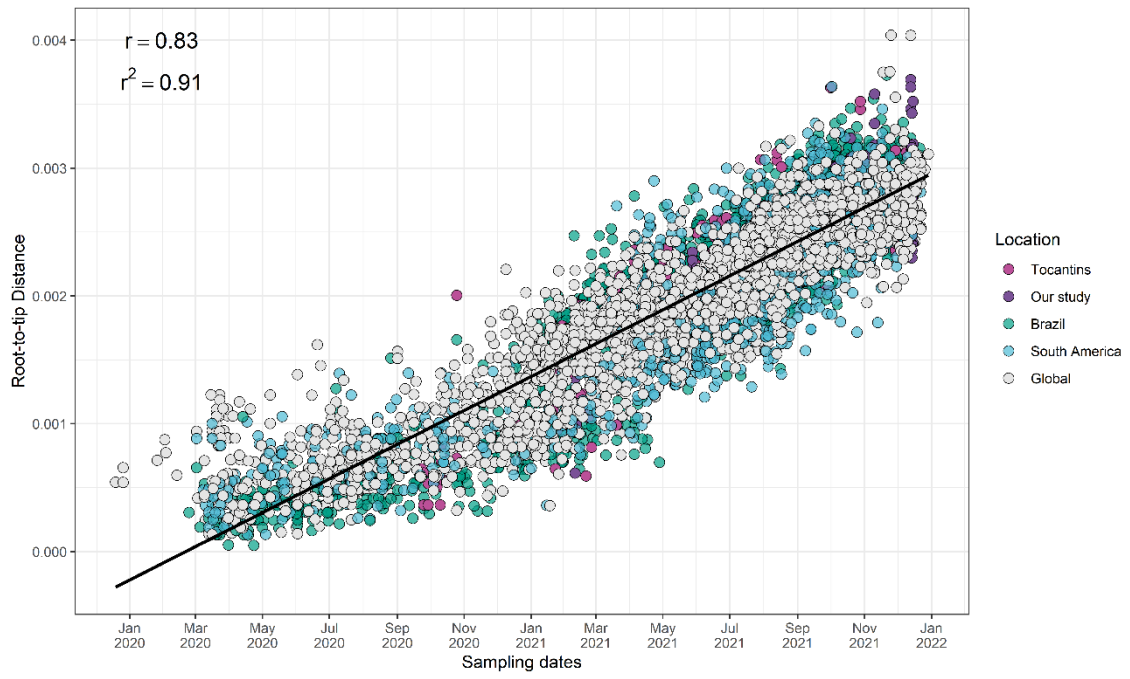

**Figure S1.** Root-to-tip regression of genetic distances and sampling dates for 9,493 sequences in the final dataset. Correlation coefficient ( $r$ ) and  $r$  squared are depicted above the graph.

**Table S1.** Epidemiological characteristics of the 241 sequenced samples from Tocantins state.

| Study ID | gisaid_epi_isl  | Cycle Threshold | Pango Lineage | date       | City                 | Age | Gender |
|----------|-----------------|-----------------|---------------|------------|----------------------|-----|--------|
| 200857   | EPI_ISL_7261181 | 15.5            | P.2           | 2020-12-21 | Araguaína            | 26  | Female |
| 211673   | EPI_ISL_7260022 | 17.3            | P.2           | 2021-01-26 | Araguaína            | 21  | Male   |
| 210150   | EPI_ISL_7260679 | 22.4            | P.1           | 2021-05-05 | Araguaína            | 30  | Male   |
| 213920   | EPI_ISL_7261608 | 22.6            | P.1.1         | 2021-05-20 | Araguaína            | 28  | Female |
| 213924   | EPI_ISL_7261616 | 19.6            | P.1           | 2021-05-20 | Araguaína            | 33  | Male   |
| 214168   | EPI_ISL_7261615 | 21.7            | P.1           | 2021-05-21 | Araguaína            | 50  | Male   |
| 361617   | EPI_ISL_3602961 | 17.8            | P.1.7         | 2021-05-26 | Gurupi               | 18  | Male   |
| 391615   | EPI_ISL_3602957 | 17.1            | P.1           | 2021-05-26 | Porto Nacional       | 51  | Female |
| 421614   | EPI_ISL_3587057 | 17.0            | P.1.7         | 2021-05-26 | Porto Nacional       | 56  | Male   |
| 61604    | EPI_ISL_3584949 | 12.5            | P.1           | 2021-05-26 | Formoso do Araguaia  | 27  | Female |
| 101616   | EPI_ISL_3602959 | 18.8            | P.1           | 2021-05-27 | Jaú do Tocantins     | 57  | Male   |
| 251614   | EPI_ISL_3585952 | 19.7            | P.1           | 2021-05-27 | Palmas               | 67  | Female |
| 271614   | EPI_ISL_3586500 | 20.0            | P.1.7         | 2021-05-27 | Palmas               | 44  | Female |
| 571615   | EPI_ISL_3602958 | 11.2            | P.1           | 2021-05-27 | Porto Nacional       | 24  | Female |
| 601616   | EPI_ISL_3602960 | 18.5            | P.1           | 2021-05-27 | Gurupi               | 28  | Male   |
| 691614   | EPI_ISL_3587490 | 20.0            | P.1           | 2021-05-27 | Palmas               | 68  | Male   |
| 711618   | EPI_ISL_3610172 | 17.8            | P.1.7         | 2021-05-27 | Rio dos Bois         | 1   | Female |
| 721614   | EPI_ISL_3598262 | 19.3            | P.1           | 2021-05-27 | Palmas               | 42  | Female |
| 881618   | EPI_ISL_3610352 | 17.5            | P.1.7         | 2021-05-27 | Fortaleza do Tabocão | 34  | Male   |
| 91614    | EPI_ISL_3585297 | 19.3            | P.1           | 2021-05-27 | Palmas               | 51  | Female |
| 911617   | EPI_ISL_3602964 | 18.4            | P.1           | 2021-05-27 | Lagoa da Confusão    | 45  | Female |
| 941614   | EPI_ISL_3602956 | 19.9            | P.1           | 2021-05-27 | Palmas               | 42  | Male   |
| 411671   | EPI_ISL_3610353 | 19.9            | P.1           | 2021-05-31 | Novo Alegre          | 12  | Female |
| 681672   | EPI_ISL_3610357 | 16.4            | P.1.7         | 2021-05-31 | Paraíso do Tocantins | 22  | Female |
| 771674   | EPI_ISL_3610358 | 19.4            | P.1           | 2021-05-31 | Rio Sono             | 26  | Male   |
| 101672   | EPI_ISL_3610355 | 19.1            | P.1           | 2021-06-01 | Palmas               | 41  | Female |
| 291672   | EPI_ISL_3610356 | 19.9            | P.1           | 2021-06-01 | Palmas               | 16  | Male   |
| 51674    | EPI_ISL_3426438 | 19.3            | P.1           | 2021-06-01 | Palmas               | 80  | Male   |
| 731671   | EPI_ISL_3610354 | 18.0            | P.1           | 2021-06-01 | Palmas               | 45  | Female |
| 791675   | EPI_ISL_3610359 | 17.7            | P.1           | 2021-06-01 | Brejinho de Nazaré   | 52  | Male   |
| 512014   | EPI_ISL_6677481 | 18.0            | P.1.7         | 2021-06-26 | Gurupi               | 27  | Male   |
| 792014   | EPI_ISL_6677505 | 18.4            | P.1.7         | 2021-06-26 | Gurupi               | 39  | Male   |
| 662015   | EPI_ISL_6678406 | 12.6            | P.1.7         | 2021-06-27 | Gurupi               | 48  | Male   |
| 922014   | EPI_ISL_6678401 | 18.0            | P.1           | 2021-06-27 | Gurupi               | 57  | Male   |
| 22013    | EPI_ISL_6677480 | 17.0            | P.1.7         | 2021-06-28 | Porto Nacional       | 26  | Female |
| 692025   | EPI_ISL_6679928 | 18.9            | P.1.7         | 2021-06-28 | Gurupi               | 54  | Female |
| 722025   | EPI_ISL_6681050 | 17.9            | P.1.7         | 2021-06-28 | Gurupi               | 54  | Male   |
| 772025   | EPI_ISL_6681796 | 17.2            | P.1.7         | 2021-06-28 | Gurupi               | 86  | Female |
| 82014    | EPI_ISL_6677590 | 20.8            | P.1.7         | 2021-06-28 | Rio dos Bois         | 65  | Male   |
| 862026   | EPI_ISL_6683276 | 18.2            | P.1.7         | 2021-06-28 | Fátima               | 33  | Male   |
| 132025   | EPI_ISL_6678511 | 18.3            | P.1.7         | 2021-06-29 | Gurupi               | 55  | Female |
| 152030   | EPI_ISL_6685073 | 18.7            | P.1.7         | 2021-06-29 | Palmas               | 38  | Male   |
| 332024   | EPI_ISL_6678411 | 19.6            | P.1           | 2021-06-29 | Palmas               | 50  | Male   |

| Study ID | gisaid_epi_isl  | Cycle Threshold | Pango Lineage | date       | City                      | Age | Gender |
|----------|-----------------|-----------------|---------------|------------|---------------------------|-----|--------|
| 482043   | EPI_ISL_7235914 | 17.7            | P.1           | 2021-06-29 | Porto Nacional            | 49  | Male   |
| 52030    | EPI_ISL_6685077 | 19.0            | P.1.7         | 2021-06-29 | Alvorada                  | 40  | Female |
| 622026   | EPI_ISL_6682191 | 18.5            | P.1.7         | 2021-06-29 | Gurupi                    | 26  | Female |
| 932024   | EPI_ISL_6677476 | 18.2            | P.1.7         | 2021-06-29 | Gurupi                    | 22  | Male   |
| 211511   | EPI_ISL_7261516 | 21.0            | P.1           | 2021-06-30 | Santa Tereza do Tocantins | 58  | Male   |
| 232043   | EPI_ISL_6686428 | 18.9            | P.1           | 2021-06-30 | Palmeirópolis             | 47  | Female |
| 32043    | EPI_ISL_7235716 | 19.7            | P.1           | 2021-07-01 | Dois Irmãos do Tocantins  | 9   | Female |
| 312060   | EPI_ISL_7246824 | 17.4            | P.1.7         | 2021-07-01 | Gurupi                    | 52  | Male   |
| 422060   | EPI_ISL_7247859 | 17.5            | P.1           | 2021-07-01 | Paraíso do Tocantins      | 41  | Male   |
| 492040   | EPI_ISL_6685140 | 19.2            | P.1           | 2021-07-01 | Palmas                    | 5   | Female |
| 632046   | EPI_ISL_7237031 | 20.8            | P.1           | 2021-07-01 | Gurupi                    | 20  | Female |
| 72043    | EPI_ISL_7236461 | 19.2            | P.1           | 2021-07-01 | Miranorte                 | 44  | Female |
| 852046   | EPI_ISL_7243779 | 18.8            | P.1.7         | 2021-07-01 | Gurupi                    | 27  | Female |
| 132058   | EPI_ISL_7244508 | 17.4            | P.1.7         | 2021-07-02 | Alvorada                  | 66  | Female |
| 572061   | EPI_ISL_7252530 | 18.9            | P.1.7         | 2021-07-02 | Gurupi                    | 16  | Male   |
| 872060   | EPI_ISL_7258225 | 18.0            | P.1.7         | 2021-07-02 | Gurupi                    | 11  | Male   |
| 802062   | EPI_ISL_7257409 | 18.1            | P.1.7         | 2021-07-03 | Palmas                    | 23  | Female |
| 92063    | EPI_ISL_7258784 | 18.1            | P.1           | 2021-07-03 | Porto Nacional            | 29  | Female |
| 222087   | EPI_ISL_7248142 | 16.3            | P.1.7         | 2021-07-06 | Dois Irmãos do Tocantins  | 69  | Male   |
| 612087   | EPI_ISL_7248428 | 17.4            | P.1.7         | 2021-07-06 | Araguacema                | 67  | Female |
| 652090   | EPI_ISL_7252071 | 16.0            | P.1           | 2021-07-06 | Paraíso do Tocantins      | 41  | Female |
| 932089   | EPI_ISL_7249880 | 17.0            | P.1           | 2021-07-06 | Palmeirópolis             | 42  | Male   |
| 732089   | EPI_ISL_7249088 | 17.0            | P.1.7         | 2021-07-07 | Palmas                    | 37  | Female |
| 332180   | EPI_ISL_7328333 | 19.2            | P.1.7         | 2021-07-16 | Araguaína                 | 3   | Male   |
| 352180   | EPI_ISL_7317425 | 17.1            | P.1.7         | 2021-07-16 | Araguaína                 | 65  | Female |
| 62180    | EPI_ISL_7317119 | 20.1            | P.1.7         | 2021-07-16 | Araguaína                 | 48  | Male   |
| 792180   | EPI_ISL_7328334 | 19.3            | P.1           | 2021-07-16 | Filadelfia                | 34  | Male   |
| 822179   | EPI_ISL_7320262 | 20.9            | P.1.7         | 2021-07-16 | Araguaína                 | 60  | Male   |
| 912181   | EPI_ISL_7359069 | 18.3            | P.1.7         | 2021-07-16 | Araguaína                 | 51  | Female |
| 272201   | EPI_ISL_7328336 | 20.6            | P.1.7         | 2021-07-18 | Combinado                 | 52  | Female |
| 912192   | EPI_ISL_7316566 | 20.5            | P.1.7         | 2021-07-18 | Gurupi                    | 79  | Male   |
| 12205    | EPI_ISL_7359183 | 21.4            | P.1.7         | 2021-07-19 | Gurupi                    | 23  | Female |
| 222205   | EPI_ISL_7359166 | 21.9            | P.1           | 2021-07-19 | Gurupi                    | 43  | Female |
| 372204   | EPI_ISL_7359144 | 22.2            | P.1.7         | 2021-07-19 | Gurupi                    | 30  | Female |
| 382201   | EPI_ISL_7328335 | 19.5            | P.1.7         | 2021-07-19 | Combinado                 | 20  | Female |
| 552193   | EPI_ISL_7317865 | 22.6            | P.1.7         | 2021-07-19 | Formoso do Araguaia       | 27  | Male   |
| 62191    | EPI_ISL_7314408 | 22.4            | P.1           | 2021-07-19 | Porto Nacional            | 54  | Female |
| 602191   | EPI_ISL_7314503 | 22.1            | P.1.7         | 2021-07-19 | Palmas                    | 60  | Female |
| 602193   | EPI_ISL_7318589 | 19.9            | P.1           | 2021-07-19 | Formoso do Araguaia       | 61  | Male   |
| 632195   | EPI_ISL_7319537 | 22.7            | P.1           | 2021-07-19 | Dois Irmãos do Tocantins  | 36  | Female |
| 662194   | EPI_ISL_7319006 | 23.0            | P.1.7         | 2021-07-19 | Aurora do Tocantins       | 32  | Male   |
| 682195   | EPI_ISL_7319775 | 22.7            | P.1.7         | 2021-07-19 | Santa Maria do Tocantins  | 46  | Female |
| 102203   | EPI_ISL_7328337 | 22.2            | P.1           | 2021-07-20 | Palmas                    | 62  | Female |
| 152204   | EPI_ISL_7314272 | 20.3            | P.1.7         | 2021-07-20 | Conceição do Tocantins    | 69  | Male   |
| 372203   | EPI_ISL_7359155 | 21.1            | P.1           | 2021-07-20 | Palmas                    | 22  | Male   |

| Study ID | gisaid_epi_isl  | Cycle Threshold | Pango Lineage | date       | City                   | Age | Gender |
|----------|-----------------|-----------------|---------------|------------|------------------------|-----|--------|
| 382213   | EPI_ISL_7359135 | 20.8            | P.1.7         | 2021-07-20 | Araguaína              | 41  | Female |
| 552213   | EPI_ISL_7314321 | 20.0            | P.1.7         | 2021-07-20 | Araguaína              | 22  | Female |
| 602213   | EPI_ISL_7359117 | 17.7            | P.1.7         | 2021-07-20 | Araguaína              | 28  | Male   |
| 732203   | EPI_ISL_7359094 | 22.6            | P.1           | 2021-07-20 | Rio Sono               | 42  | Male   |
| 842203   | EPI_ISL_7359083 | 17.7            | P.1           | 2021-07-20 | Lagoa da Confusão      | 34  | Male   |
| 902203   | EPI_ISL_7359075 | 20.4            | P.1           | 2021-07-20 | Lagoa da Confusão      | 9   | Female |
| 432250   | EPI_ISL_7615307 | 23.5            | P.1           | 2021-07-23 | Abreulândia            | 62  | Female |
| 442250   | EPI_ISL_7615308 | 24.2            | P.1           | 2021-07-23 | Araguacema             | 65  | Female |
| 52234    | EPI_ISL_7615309 | 20.4            | P.1           | 2021-07-23 | Palmas                 | 29  | Male   |
| 432247   | EPI_ISL_7615310 | 22.8            | P.1           | 2021-07-24 | Palmas                 | 34  | Male   |
| 632248   | EPI_ISL_7615332 | 24.2            | P.1           | 2021-07-24 | Palmas                 | 38  | Male   |
| 632321   | EPI_ISL_7359106 | 17.1            | P.1.7         | 2021-08-01 | Combinado              | 33  | Female |
| 642321   | EPI_ISL_7359100 | 20.2            | P.1.7         | 2021-08-01 | Palmas                 | 36  | Male   |
| 212320   | EPI_ISL_7315509 | 19.3            | P.1.7         | 2021-08-02 | Paraíso do Tocantins   | 80  | Male   |
| 102321   | EPI_ISL_7359176 | 22.7            | P.1.7         | 2021-08-03 | Palmas                 | 45  | Male   |
| 112322   | EPI_ISL_7314566 | 20.9            | P.1.7         | 2021-08-03 | Miracema do Tocantins  | 49  | Female |
| 302320   | EPI_ISL_7316019 | 20.2            | P.1.7         | 2021-08-03 | Palmas                 | 46  | Male   |
| 522321   | EPI_ISL_7359128 | 19.2            | P.1           | 2021-08-03 | Palmas                 | 53  | Female |
| 932321   | EPI_ISL_7359060 | 14.3            | P.1.7         | 2021-08-03 | Combinado              | 16  | Female |
| 502342   | EPI_ISL_7615305 | 15.0            | AY.42         | 2021-08-05 | Taguatinga             | 62  | Female |
| 512342   | EPI_ISL_7615306 | 14.7            | AY.42         | 2021-08-05 | Taguatinga             | 71  | Male   |
| 832342   | EPI_ISL_7615311 | 16.7            | P.1.7         | 2021-08-05 | Gurupi                 | 69  | Male   |
| 852342   | EPI_ISL_7615312 | 18.8            | P.1.7         | 2021-08-05 | Gurupi                 | 52  | Female |
| 862343   | EPI_ISL_7615313 | 16.7            | P.1.7         | 2021-08-05 | Gurupi                 | 47  | Male   |
| 902355   | EPI_ISL_7615333 | 26.8            | P.1.7         | 2021-08-08 | Palmas                 | 53  | Female |
| 392383   | EPI_ISL_7615317 | 17.9            | P.1           | 2021-08-11 | Alvorada               | 61  | Female |
| 552384   | EPI_ISL_7615319 | 16.4            | P.1.7         | 2021-08-11 | Fátima                 | 38  | Female |
| 752383   | EPI_ISL_7615318 | 17.4            | P.1.7         | 2021-08-11 | Araguacema             | 17  | Male   |
| 812382   | EPI_ISL_7615315 | 16.3            | P.1.7         | 2021-08-11 | Palmeirópolis          | 19  | Female |
| 902381   | EPI_ISL_7615314 | 15.6            | P.1           | 2021-08-11 | Gurupi                 | 34  | Female |
| 932382   | EPI_ISL_7615316 | 16.1            | P.1.7         | 2021-08-11 | Sandolândia            | 69  | Male   |
| 692404   | EPI_ISL_7615320 | 19.4            | P.1           | 2021-08-14 | Natividade             | 41  | Male   |
| 502419   | EPI_ISL_7615321 | 17.2            | P.1.7         | 2021-08-16 | Figueirópolis          | 34  | Female |
| 512419   | EPI_ISL_7615322 | 17.9            | P.1.7         | 2021-08-16 | Figueirópolis          | 9   | Male   |
| 532419   | EPI_ISL_7615323 | 17.1            | P.1.7         | 2021-08-16 | Figueirópolis          | 35  | Female |
| 822409   | EPI_ISL_7615331 | 22.5            | P.1           | 2021-08-16 | Palmas                 | 26  | Male   |
| 872409   | EPI_ISL_7615334 | 18.5            | P.1.7         | 2021-08-16 | Lavandeira             | 43  | Female |
| 182419   | EPI_ISL_7615330 | 18.5            | P.1.7         | 2021-08-17 | Formoso do Araguaia    | 33  | Female |
| 192419   | EPI_ISL_7615328 | 16.3            | P.1.7         | 2021-08-17 | Formoso do Araguaia    | 15  | Female |
| 242419   | EPI_ISL_7615324 | 18.7            | P.1.7         | 2021-08-17 | Formoso do Araguaia    | 70  | Female |
| 302419   | EPI_ISL_7615329 | 18.4            | P.1.7         | 2021-08-17 | Formoso do Araguaia    | 38  | Female |
| 212441   | EPI_ISL_7657567 | 19.2            | AY.99.2       | 2021-08-20 | Palmas                 | 28  | Male   |
| 602450   | EPI_ISL_7615325 | 21.2            | P.1.7         | 2021-08-21 | Palmas                 | 46  | Male   |
| 22451    | EPI_ISL_7615326 | 22.1            | P.1           | 2021-08-22 | Bom Jesus do Tocantins | 34  | Male   |
| 332454   | EPI_ISL_7615327 | 18.4            | P.1.7         | 2021-08-22 | Gurupi                 | 69  | Female |

| Study ID | gisaid_epi_isl  | Cycle Threshold | Pango Lineage | date       | City                     | Age     | Gender |
|----------|-----------------|-----------------|---------------|------------|--------------------------|---------|--------|
| 522472   | EPI_ISL_7657568 | 23.0            | AY.99.2       | 2021-08-25 | Palmas                   | 40      | Female |
| 482479   | EPI_ISL_7657565 | 18.0            | AY.99.2       | 2021-08-26 | Palmas                   | 26      | Female |
| 472494   | EPI_ISL_7657566 | 19.6            | AY.99.2       | 2021-08-28 | Porto Nacional           | 82      | Male   |
| 622492   | EPI_ISL_7657581 | 24.5            | AY.99.2       | 2021-08-28 | Palmas                   | 28      | Male   |
| 212500   | EPI_ISL_7657582 | 19.5            | AY.99.2       | 2021-08-30 | Palmas                   | 17      | Male   |
| 42507    | EPI_ISL_7657569 | 17.5            | AY.99.2       | 2021-08-30 | Palmas                   | 73      | Female |
| 662520   | EPI_ISL_7657574 | 21.2            | P.1.7         | 2021-09-01 | Paranã                   | 32      | Male   |
| 672520   | EPI_ISL_7657591 | 23.1            | P.1.7         | 2021-09-01 | Paranã                   | 21      | Male   |
| 712520   | EPI_ISL_7657575 | 21.0            | P.1.14        | 2021-09-01 | Paranã                   | 39      | Female |
| 752520   | EPI_ISL_7657576 | 23.9            | P.1.7         | 2021-09-01 | Paranã                   | 63      | Female |
| 762520   | EPI_ISL_7657578 | 18.6            | P.1           | 2021-09-01 | Paranã                   | 50      | Male   |
| 772520   | EPI_ISL_7657577 | 22.0            | P.1.7         | 2021-09-01 | Paranã                   | 36      | Male   |
| 32526    | EPI_ISL_7657592 | 20.3            | AY.99.2       | 2021-09-02 | Palmas                   | 44      | Female |
| 112529   | EPI_ISL_7657580 | 20.0            | P.1.7         | 2021-09-03 | Palmas                   | 53      | Male   |
| 892567   | EPI_ISL_7657559 | 20.9            | AY.99.2       | 2021-09-12 | Santa Rosa do Tocantins  | 33      | Male   |
| 352570   | EPI_ISL_7657563 | 16.9            | AY.99.2       | 2021-09-13 | Porto Nacional           | 13      | Female |
| 362570   | EPI_ISL_7657564 | 16.5            | AY.99.2       | 2021-09-13 | Porto Nacional           | 46      | Female |
| 702564   | EPI_ISL_7657558 | 20.5            | AY.99.2       | 2021-09-13 | Palmas                   | 18      | Female |
| 142569   | EPI_ISL_7657561 | 17.4            | AY.122        | 2021-09-14 | Araguatins               | 24      | Male   |
| 32570    | EPI_ISL_7657562 | 18.1            | AY.99.2       | 2021-09-14 | Palmas                   | 31      | Female |
| 622570   | EPI_ISL_7657579 | 19.7            | P.1.7         | 2021-09-14 | Palmas                   | 23      | Female |
| 772568   | EPI_ISL_7657560 | 18.6            | AY.116        | 2021-09-14 | Palmas                   | 56      | Male   |
| 292578   | EPI_ISL_7657570 | 18.3            | AY.99.2       | 2021-09-15 | Santa Maria do Tocantins | 2       | Male   |
| 332577   | EPI_ISL_7657572 | 19.7            | AY.99.2       | 2021-09-15 | Palmas                   | 15      | Female |
| 322600   | EPI_ISL_7657585 | 18.3            | AY.99.2       | 2021-09-20 | Pindorama do Tocantins   | 9       | Male   |
| 332600   | EPI_ISL_7657587 | 18.5            | AY.99.2       | 2021-09-20 | Pindorama do Tocantins   | 7       | Male   |
| 872600   | EPI_ISL_7657573 | 19.2            | AY.43         | 2021-09-20 | Palmas                   | 25      | Male   |
| 892600   | EPI_ISL_7657590 | 19.9            | AY.99.2       | 2021-09-20 | Palmas                   | 8       | Female |
| 782598   | EPI_ISL_7657571 | 16.6            | AY.42         | 2021-09-21 | Lagoa da Confusão        | 38      | Male   |
| 413146   | EPI_ISL_7661119 | 21              | AY.99.2       | 2021-10-13 | Palmas                   | 39      | Male   |
| 413250   | EPI_ISL_7661128 | 16.7            | AY.43         | 2021-10-18 | Palmas                   | 35      | Male   |
| 42807    | EPI_ISL_7661120 | 19.2            | AY.99.2       | 2021-11-04 | Palmas                   | 25      | Male   |
| 513886   | EPI_ISL_7661129 | 18              | AY.99.2       | 2021-11-16 | Palmas                   | 38      | Female |
| 913216   | EPI_ISL_7661121 | 19.7            | AY.43         | 2021-10-15 | Palmas                   | 1 month | Male   |
| 1013129  | EPI_ISL_7661130 | 21.9            | AY.99.2       | 2021-10-11 | Palmas                   | 65      | Male   |
| 1013130  | EPI_ISL_7661144 | 25.8            | AY.99.2       | 2021-10-11 | Palmas                   | 78      | Male   |
| 1013132  | EPI_ISL_7661145 | 22.1            | AY.99.2       | 2021-10-12 | Palmas                   | 18 days | Male   |
| 1013162  | EPI_ISL_7661122 | 16.5            | AY.99.2       | 2021-10-14 | Palmas                   | 84      | Female |
| 1113216  | EPI_ISL_7661146 | 17.6            | AY.99.2       | 2021-10-15 | Abreulândia              | 42      | Female |
| 1113256  | EPI_ISL_7661123 | 21.1            | AY.43         | 2021-10-18 | Palmas                   | 55      | Male   |
| 1413055  | EPI_ISL_7661150 | 19.5            | AY.99.2       | 2021-10-07 | Porto Nacional           | 74      | Female |
| 1413062  | EPI_ISL_7661141 | 26              | AY.99.2       | 2021-10-07 | Formoso do Araguaia      | 43      | Female |
| 1413216  | EPI_ISL_7661140 | 25.9            | AY.99.2       | 2021-10-15 | Palmas                   | 55      | Male   |
| 162807   | EPI_ISL_7661131 | 21.1            | AY.99.2       | 2021-10-15 | Palmas                   | 19      | Female |
| 232839   | EPI_ISL_7661124 | 19.9            | AY.99.2       | 2021-11-11 | Palmas                   | 45      | Female |

| Study ID | gisaid_epi_isl   | Cycle Threshold | Pango Lineage | date       | City                    | Age | Gender |
|----------|------------------|-----------------|---------------|------------|-------------------------|-----|--------|
| 362839   | EPI_ISL_7661125  | 18.1            | AY.116        | 2021-11-11 | Palmas                  | 40  | Female |
| 382807   | EPI_ISL_7661126  | 18.2            | AY.43         | 2021-11-04 | Palmas                  | 26  | Male   |
| 492807   | EPI_ISL_7661142  | 18.2            | AY.99.2       | 2021-11-04 | Palmas                  | 40  | Male   |
| 582839   | EPI_ISL_7661127  | 18.4            | AY.99.2       | 2021-11-11 | Palmas                  | 22  | Male   |
| 592807   | EPI_ISL_7661151  | 17.3            | AY.99.2       | 2021-11-04 | Palmas                  | 36  | Male   |
| 712876   | EPI_ISL_7661132  | 22              | AY.99.2       | 2021-11-20 | Rio dos Bois            | 27  | Female |
| 872839   | EPI_ISL_7661133  | 15.5            | AY.99.2       | 2021-11-11 | Palmas                  | 49  | Female |
| 2100421  | EPI_ISL_7661147  | 21.4            | AY.99.2       | 2021-10-21 | Piraquê                 | 46  | Female |
| 2100096  | EPI_ISL_7661134  | 19.9            | AY.43         | 2021-10-20 | São Miguel do Tocantins | 61  | Male   |
| 2103932  | EPI_ISL_7661149  | 18.7            | AY.99.2       | 2021-10-20 | Araguaína               | 32  | Male   |
| 2103934  | EPI_ISL_7661135  | 19.4            | AY.99.2       | 2021-10-20 | Araguaína               | 83  | Male   |
| 2103333  | EPI_ISL_7661136  | 20.3            | AY.43         | 2021-10-21 | Araguaína               | 20  | Male   |
| 2100775  | EPI_ISL_7661137  | 22.0            | AY.3          | 2021-10-20 | Couto Magalhães         | 32  | Male   |
| 2100420  | EPI_ISL_7661148  | 16.1            | AY.99.2       | 2021-10-20 | Piraquê                 | 24  | Female |
| 2101977  | EPI_ISL_7661138  | 17.6            | AY.43         | 2021-10-20 | Augustinópolis          | 36  | Female |
| 2101149  | EPI_ISL_7661143  | 17.0            | AY.99.2       | 2021-10-20 | Araguaína               | 71  | Male   |
| 2106665  | EPI_ISL_7661139  | 19.1            | AY.99.2       | 2021-10-20 | Colinas do Tocantins    | 42  | Female |
| 413009   | EPI_ISL_10083514 | 17.2            | AY.99.2       | 2021-12-13 | Palmas                  | 9   | Female |
| 583009   | EPI_ISL_10083515 | 21              | AY.99.2       | 2021-12-13 | Palmas                  | 39  | Female |
| 873009   | EPI_ISL_10083516 | 19.3            | AY.43         | 2021-12-13 | Palmas                  | 32  | Male   |
| 13008    | EPI_ISL_10083517 | 18.9            | AY.43         | 2021-12-10 | Porto Nacional          | 29  | Male   |
| 273008   | EPI_ISL_10083518 | 21.7            | AY.99.2       | 2021-12-13 | Gurupi                  | 70  | Female |
| 353008   | EPI_ISL_10083519 | 20.4            | AY.43         | 2021-12-11 | Gurupi                  | 55  | Female |
| 813008   | EPI_ISL_10083520 | 20.9            | AY.43         | 2021-12-13 | Cariri do Tocantins     | 36  | Female |
| 853008   | EPI_ISL_10083521 | 21.3            | AY.43         | 2021-12-13 | Cariri do Tocantins     | 30  | Female |
| 203007   | EPI_ISL_10083522 | 19.7            | AY.99.2       | 2021-12-13 | Palmas                  | 24  | Female |
| 213007   | EPI_ISL_10083523 | 17.9            | AY.99.2       | 2021-12-13 | Gurupi                  | 32  | Female |
| 443007   | EPI_ISL_10083524 | 20.6            | AY.99.2       | 2021-12-13 | Palmas                  | 42  | Female |
| 573007   | EPI_ISL_10083525 | 23.3            | AY.99.2       | 2021-12-13 | Palmas                  | 41  | Male   |
| 653007   | EPI_ISL_10083526 | 16.9            | AY.43         | 2021-12-10 | Figueirópolis           | 62  | Male   |
| 633007   | EPI_ISL_8170818  | 19.8            | BA.1          | 2021-12-10 | Gurupi                  | 29  | Male   |
| 673007   | EPI_ISL_10083527 | 19.8            | AY.99.2       | 2021-12-10 | Gurupi                  | 25  | Male   |
| 473014   | EPI_ISL_10083528 | 16.3            | AY.99.2       | 2021-12-13 | Palmas                  | 57  | Male   |
| 523014   | EPI_ISL_10083529 | 18.2            | AY.99.2       | 2021-12-13 | Porto Nacional          | 72  | Female |
| 533014   | EPI_ISL_10083530 | 18.9            | AY.99.2       | 2021-12-13 | Porto Nacional          | 43  | Male   |
| 603014   | EPI_ISL_10083531 | 21.1            | AY.99.2       | 2021-12-13 | Porto Nacional          | 50  | Male   |
| 693014   | EPI_ISL_10083532 | 12.7            | AY.99.2       | 2021-12-13 | Miracema do Tocantins   | 39  | Female |
| 723014   | EPI_ISL_10083533 | 18.9            | AY.99.2       | 2021-12-13 | Miracema do Tocantins   | 57  | Female |
| 763014   | EPI_ISL_10083534 | 18              | AY.43         | 2021-12-13 | Miracema do Tocantins   | 35  | Female |
| 823014   | EPI_ISL_10083535 | 20.6            | AY.99.2       | 2021-12-13 | Miracema do Tocantins   | 9   | Female |
| 873014   | EPI_ISL_10083536 | 21.8            | AY.43         | 2021-12-13 | Miracema do Tocantins   | 49  | Female |
| 323017   | EPI_ISL_10083537 | 14.8            | AY.43         | 2021-12-13 | Porto Nacional          | 66  | Female |
| 663017   | EPI_ISL_10083538 | 17.5            | AY.43         | 2021-12-14 | Palmas                  | 44  | Female |
| 733017   | EPI_ISL_10083539 | 22.3            | AY.43         | 2021-12-14 | Palmas                  | 63  | Female |
| 813017   | EPI_ISL_10083540 | 22.7            | AY.43         | 2021-12-14 | Palmas                  | 23  | Female |

| Study ID | gisaid_epi_isl   | Cycle Threshold | Pango Lineage | date       | City                      | Age | Gender |
|----------|------------------|-----------------|---------------|------------|---------------------------|-----|--------|
| 893017   | EPI_ISL_10083541 | 17.6            | AY.43         | 2021-12-14 | Palmas                    | 61  | Female |
| 53018    | EPI_ISL_10083542 | 21.6            | AY.43         | 2021-12-14 | Palmas                    | 59  | Female |
| 203018   | EPI_ISL_10083543 | 18.8            | AY.99.2       | 2021-12-13 | Palmas                    | 45  | Male   |
| 253018   | EPI_ISL_10083544 | 21.7            | AY.99.2       | 2021-12-13 | Palmas                    | 28  | Male   |
| 293018   | EPI_ISL_10083545 | 19.8            | AY.99.2       | 2021-12-13 | Brejinho de Nazaré        | 49  | Male   |
| 313018   | EPI_ISL_10083546 | 18.4            | AY.43         | 2021-12-13 | Brejinho de Nazaré        | 38  | Female |
| 333018   | EPI_ISL_10083547 | 20.5            | AY.99.2       | 2021-12-13 | Brejinho de Nazaré        | 45  | Female |
| 693018   | EPI_ISL_10083548 | 19.1            | AY.99.2       | 2021-12-14 | Palmas                    | 50  | Female |
| 893018   | EPI_ISL_10083549 | 16.3            | AY.43         | 2021-12-14 | Palmas                    | 18  | Female |
| 813019   | EPI_ISL_10083550 | 19.5            | AY.34.1.1     | 2021-12-14 | Palmas                    | 16  | Female |
| 373019   | EPI_ISL_10083551 | 20.3            | AY.99.2       | 2021-12-14 | Tocantinia                | 36  | Female |
| 103039   | EPI_ISL_10083552 | 20.5            | AY.43         | 2021-12-15 | Tupiratins                | 22  | Male   |
| 223039   | EPI_ISL_10083553 | 17.9            | AY.99.2       | 2021-12-16 | Santa Tereza do Tocantins | 41  | Male   |
| 383039   | EPI_ISL_10083554 | 19.8            | AY.43         | 2021-12-16 | Palmas                    | 66  | Male   |
| 463039   | EPI_ISL_10083555 | 22.9            | AY.99.2       | 2021-12-16 | Dianapolis                | 55  | Female |
| 613039   | EPI_ISL_10083556 | 22.3            | AY.43         | 2021-12-16 | Palmas                    | 25  | Male   |
| 673039   | EPI_ISL_10083557 | 18.7            | AY.99.2       | 2021-12-16 | Palmas                    | 41  | Male   |
| 803039   | EPI_ISL_10083558 | 16.3            | AY.99.2       | 2021-12-16 | Palmas                    | 34  | Male   |

Distribution of sequenced SARS-CoV-2 genomes in Tocantins state

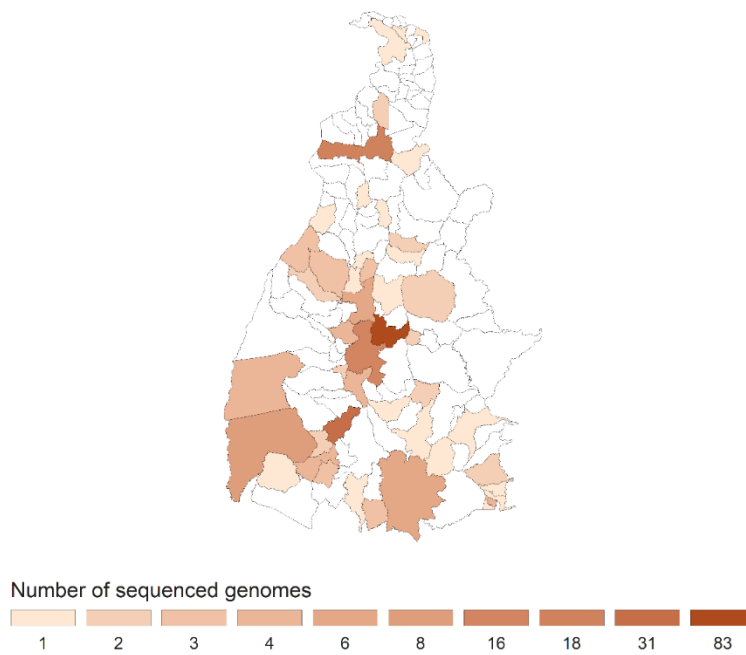

**Figure S2.** Spatiotemporal distribution of the 241 sequenced genomes from Tocantins state. The figure was generated using R v4.1.2 with the following packages: ggplot2, geojsonio, sf, broom and dplyr.



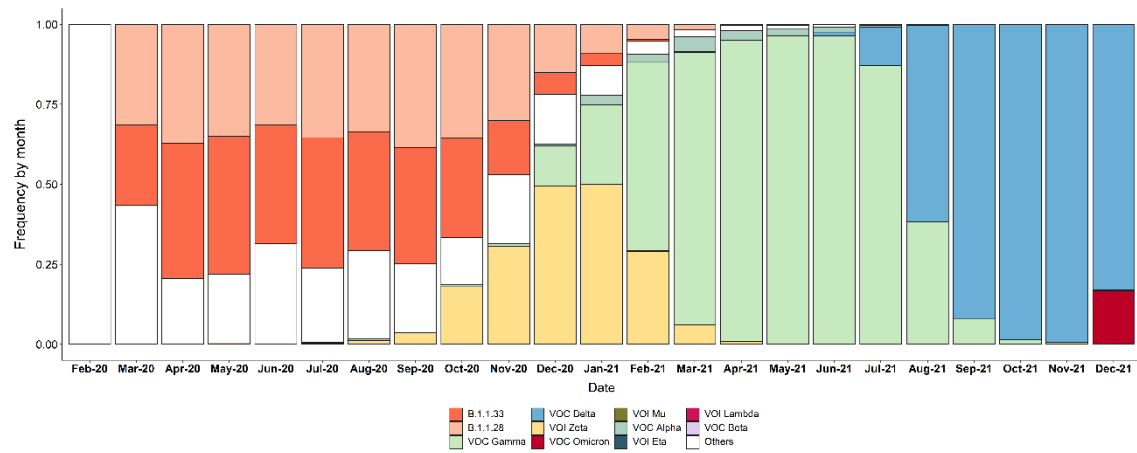

**Figure S3.** Frequency of SARS-CoV-2 variants in Brazil from February 2020 to December 2021. The figure was generated based on 91,201 Brazilian genomes deposited on GISAID up to 31 December 2021. For B.1.1.33 and B.1.1.28 was used Pango nomenclature and per the latest WHO nomenclature of SARS-CoV-2 variants.
